# Supplementary material for: Auxiliary subunits of the CKAMP family differentially modulate AMPA receptor properties
Source: eLife journal article supplement (doi:10.7554/elife.09693), 2015-12-01
Supplement: supp [file elife-09693-supp-v1.zip]

### Figure 1-figure supplement 1

[illegible]
