# Supplementary figures and images for: Auxiliary subunits of the CKAMP family differentially modulate AMPA receptor properties
Source: eLife journal article supplement (doi:10.7554/elife.09693), 2015-12-01

Figure 2-figure supplement 1

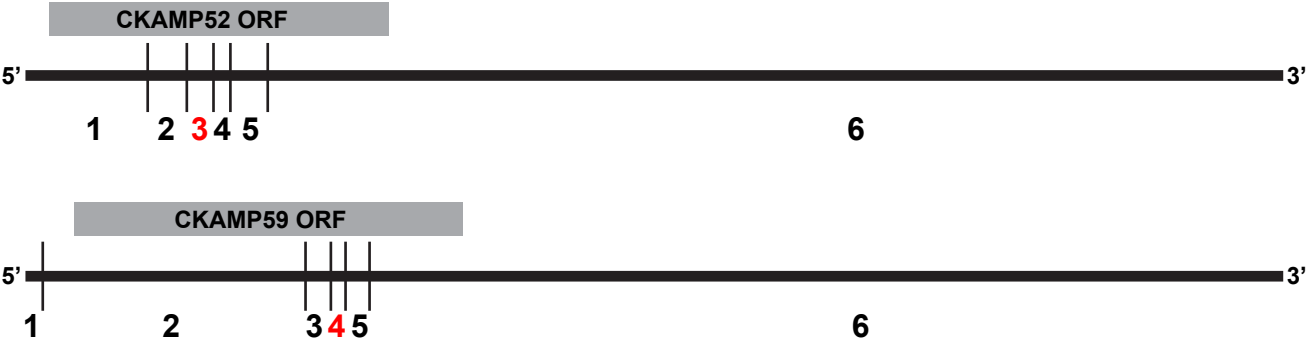

Supplement: supp [file elife-09693-supp-v1.zip]

Figure 2-figure supplement 2

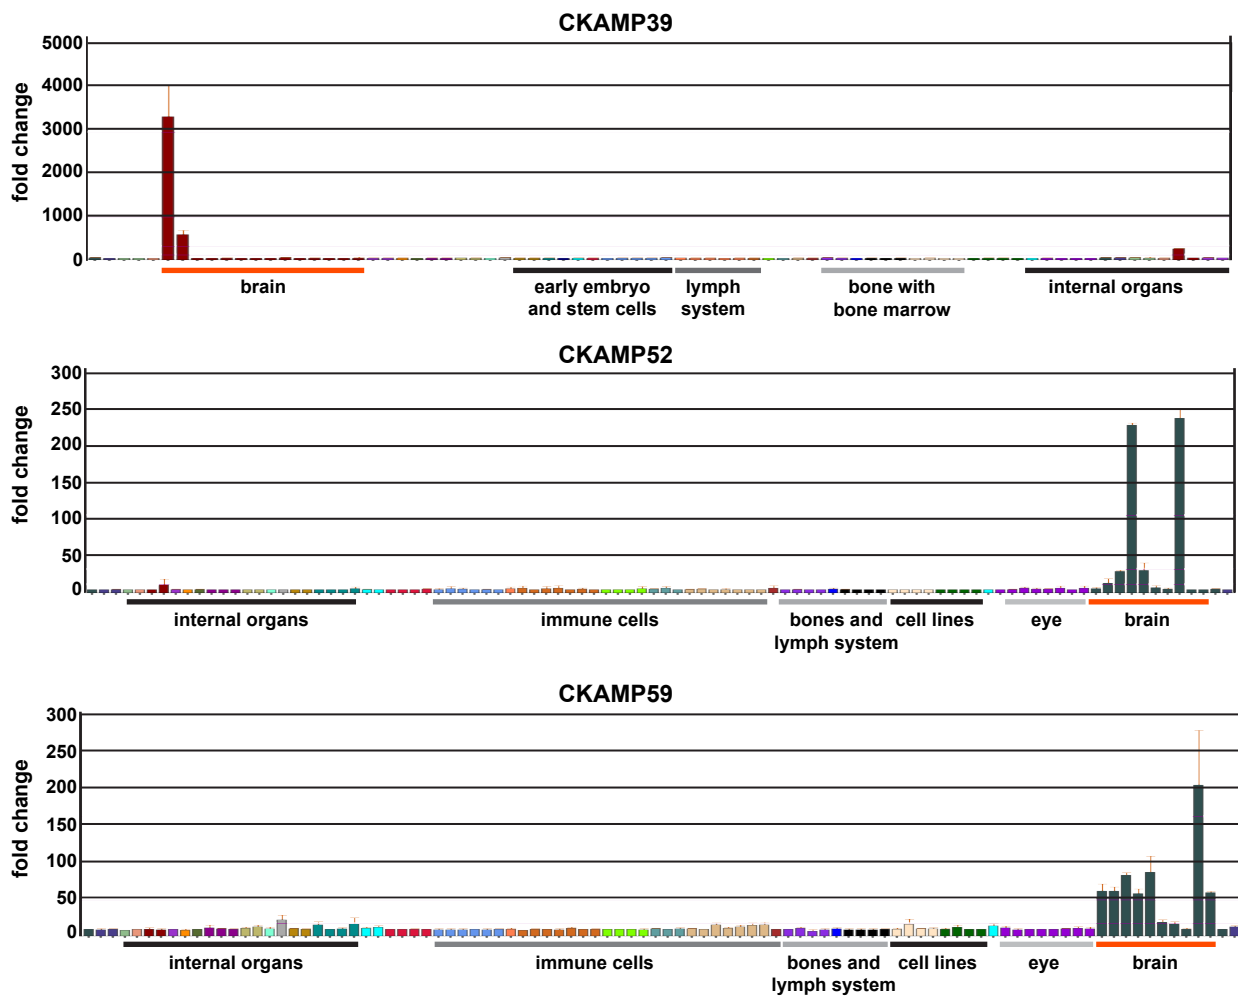

Supplement: supp [file elife-09693-supp-v1.zip]

Figure 5-figure supplement 1

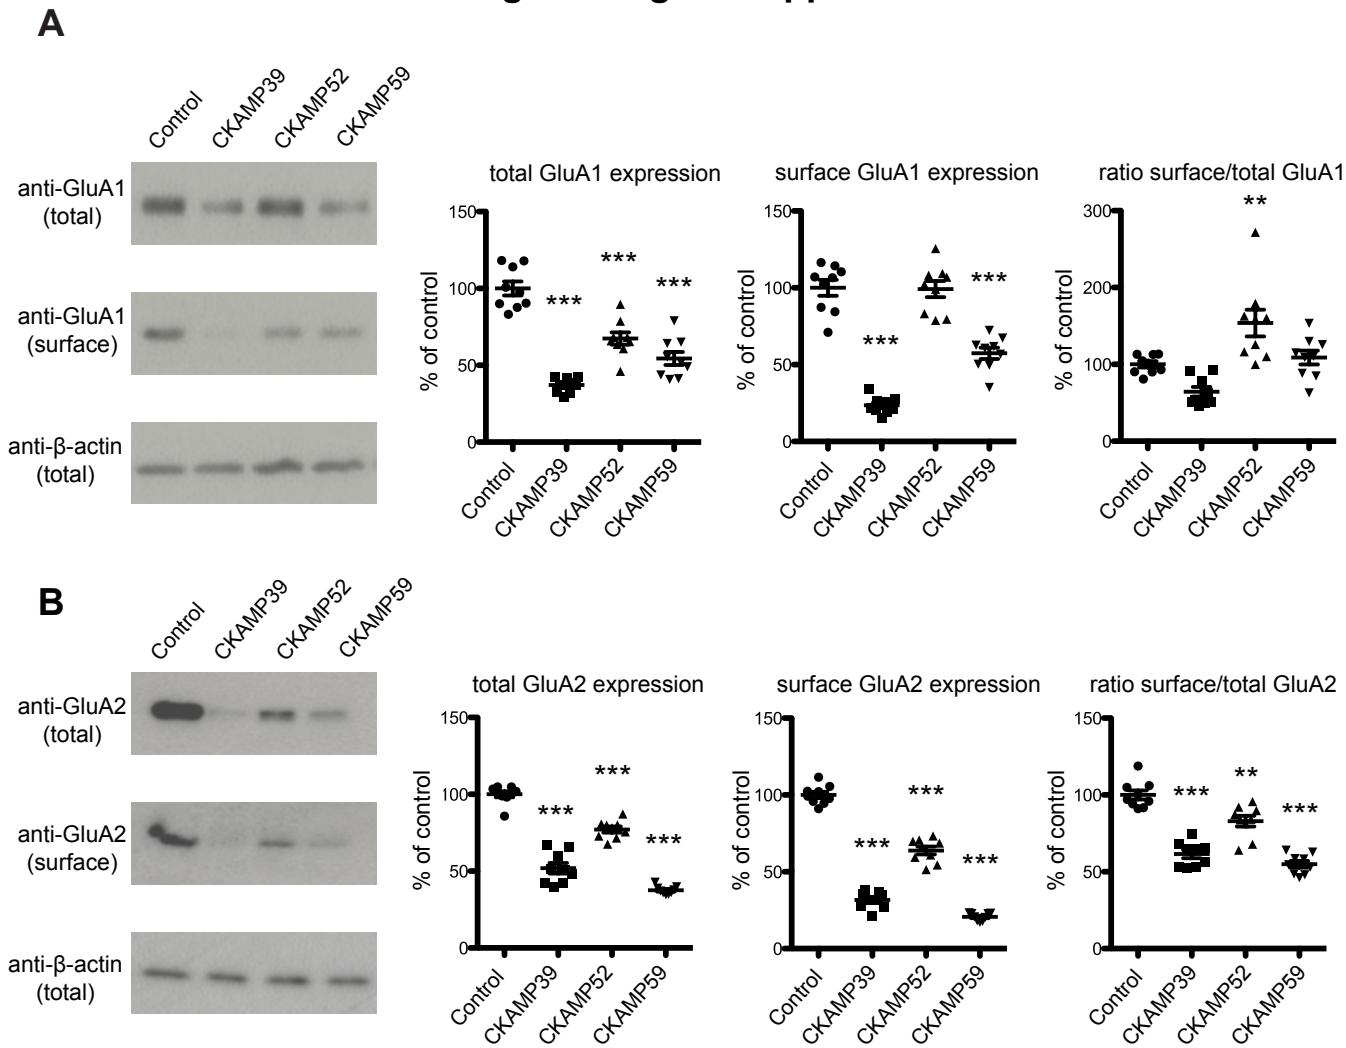

Supplement: supp [file elife-09693-supp-v1.zip]
